# Supplementary material for: Immunotherapy in patients with metastatic castration-resistant prostate cancer: a meta-analysis of data from 7 phase III studies and 3 phase II studies
Source: PubMed Central journal article supplement (PMC9511714; doi:10.1186/s40164-022-00312-y), 2022-09-26
Supplement: 40164_2022_312_MOESM2_ESM.pdf [file 40164_2022_312_MOESM2_ESM.pdf]

**Table S1. Ongoing III phase randomized trials with immunotherapy in mCRPC**

| Trial       | Experimental arm                   | Control arm                              | Primary endpoint | Phase | State                  | Last updated       |
|-------------|------------------------------------|------------------------------------------|------------------|-------|------------------------|--------------------|
| NCT04100018 | Nivolumab + Docetaxel + Prednisone | Placebo + Docetaxel + Prednisone         | OS, rPFS         | III   | Recruiting             | January 11, 2022   |
| NCT04446117 | Cabozantinib + Atezolizumab        | Abiraterone+ Prednisone /Enzalutamide    | PFS, OS          | III   | Recruiting             | December 2, 2021   |
| NCT03016312 | Atezolizumab + Enzalutamide        | Enzalutamide                             | OS               | III   | Active, not recruiting | January 12, 2022   |
| NCT03834493 | Pembrolizumab + Enzalutamide       | Placebo + Enzalutamide                   | OS, rPFS         | III   | Recruiting             | February 17, 2022  |
| NCT04907227 | Pembrolizumab+ Docetaxel           | Placebo+Docetaxel                        | OS, rPFS         | III   | Recruiting             | July 7, 2021       |
| NCT04934722 | Pembrolizumab + Enzalutamide + ADT | Placebo + Enzalutamide + ADT             | OS, rPFS         | III   | Recruiting             | September 8, 2021  |
| NCT03834506 | Pembrolizumab+ Docetaxel           | Placebo+Docetaxel                        | OS, rPFS         | III   | Active, not recruiting | June 9, 2021       |
| NCT03834519 | Pembrolizumab + Olaparib           | Abiraterone + Prednisone or Enzalutamide | OS, rPFS         | III   | Active, not recruiting | September 16, 2021 |
